# Supplementary material for: Generation of Conditional Knockout Alleles for PRUNE-1
Source: MDPI journal article supplement (doi:10.3390/cells12040524), 2023-02-06
Supplement: s1 [file s1]

## Legends for Supplemental Figures

**Figure S1.** The sequence of donor DNAs used for generating conditional mouse allele of the *Prune1*. The sequence of homologous arms and *loxP* site are indicated. The red front represents the sequence used for gRNA synthesis, and the green front indicates the protospacer adjacent motif (PAM).

**Figure S2.** Genotyping of targeted alleles through zygote electroporation. Zygote electroporation of 100 ng/ $\mu$ L of gRNA, 200 ng/ $\mu$ L of donor DNA and 50 ng/ $\mu$ L Cas9 in a 10  $\mu$ L volume of Opti-MEM® was used for both targeting. The ratio of electroporated zygotes developed to the blastocytes in both targeting was around 50%. gRNA/donor DNA used for targeting 5' *loxP* showed significantly higher efficiency on generating homozygous knock-in (indicated by red arrows) than the one used for targeting 3' *loxP*.

**Figure S3.** The DNA sequencing data to confirm the corrected insertion of *loxP* sites into the *Prune1* locus in the *Prune1*<sup>F/F</sup> allele.

**Figure S4.** Generation of the *Prune1* <sup>$\Delta$ exon6</sup> allele. (a) The *Prune1*<sup>F/F</sup> allele was bred with *EIIa-Cre* mice for the excision of exon 6, resulting in the *Prune1* <sup>$\Delta$ exon6</sup> allele. (b) PCR genotyping for the detection of the excision of exon 6 in the *Prune1* <sup>$\Delta$ exon6</sup> allele. Lane 1, the wild-type with a ~1.4 kb PCR product; Lane 2, the *Prune1* <sup>$\Delta$ exon6/ $\Delta$ exon6</sup> homozygote in which a single 329 bp PCR product was detected.

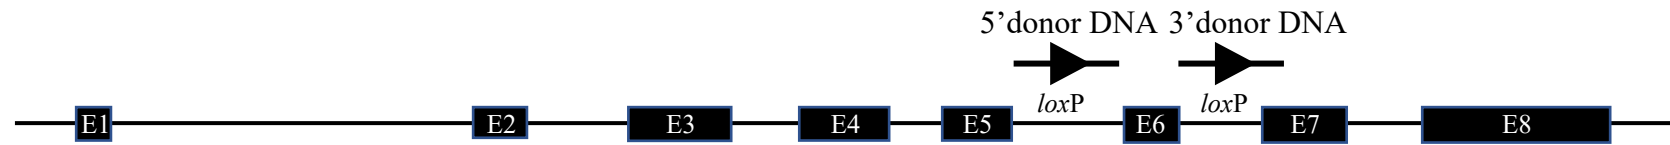

5' donor DNA

cacacccagtaaagctgctcttctttaccctcc**tacaaagtcctcaatc**ATAACTTCGTATAGCATACATTATACGAAGTTAT

Homologous arm

*loxP*

tacaggcagccatttaactattgtgacctgattgtagcatttagagtttctttat

Homologous arm

3' donor DNA

tgctcatggcacaaggggattggtttgtggtttgt**tagtagtcgtgctcaa**ATAACTTCGTATAGCATACATTATACGAAGTTAT

Homologous arm

*loxP*

agaaggaagaaattagattcagaaatctctctctctcccttctcccctctccttct

Homologous arm

Figure S1

(a) Zygote electroporation with gRNA/Donor for 5' *loxP* site

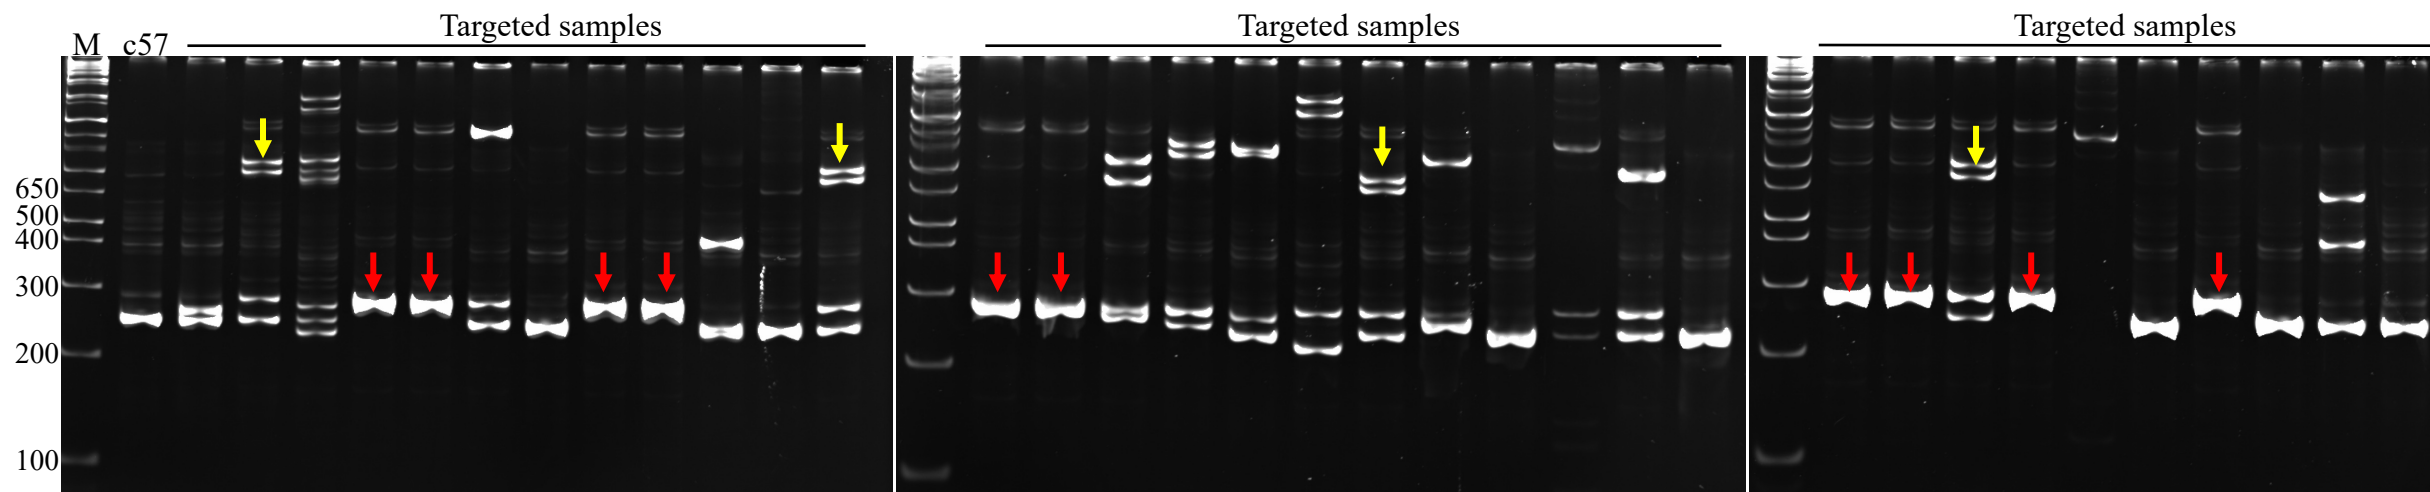

10/34 samples showed homozygous knock-in (indicated by red arrows)  
4/34 samples showed heterozygous knock-in (yellow arrows)  
20/34 samples contained Indel or other mutations

(b) Zygote electroporation with gRNA/Donor for 3' *loxP* site

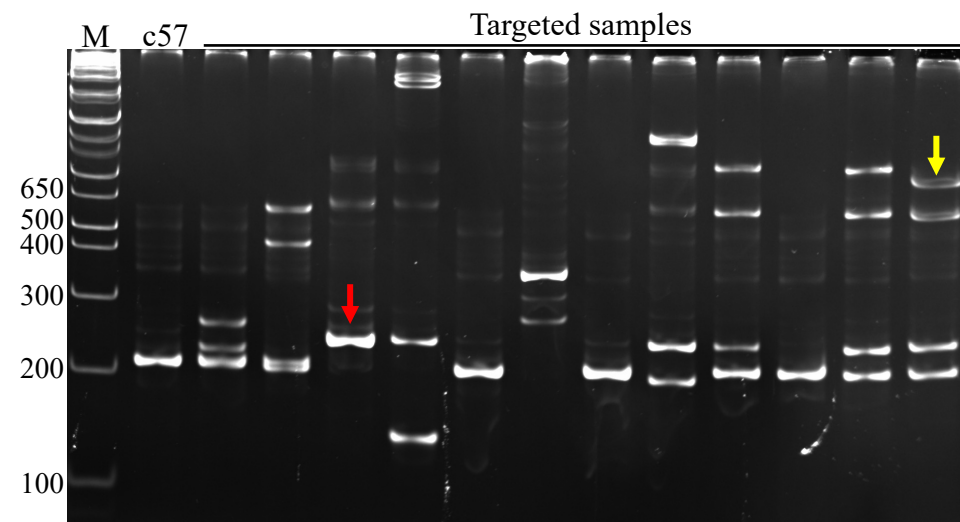

1/12 samples showed homozygous knock-in (indicated by red arrow)  
1/12 showed heterozygous knock-in (yellow arrow)

Figure S2

### ▼ Quality Graph

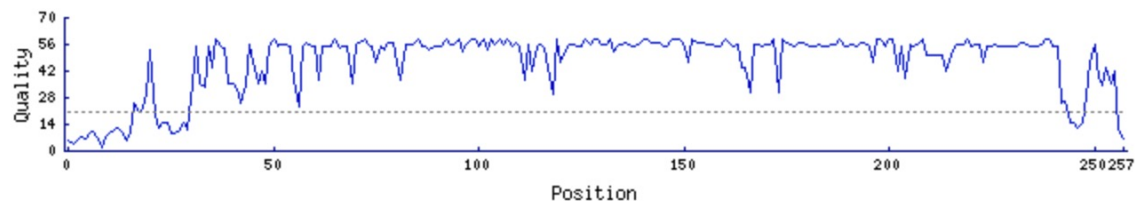

|                    |       |                       |       |             |        |
|--------------------|-------|-----------------------|-------|-------------|--------|
| <b>Read Length</b> | 258 b | <b>Trimmed Length</b> | 243 b | <b>Pos.</b> | 16-258 |
| <b>Q20</b>         | 227 b | <b>Q20/len</b>        | 0.88  |             |        |
| <b>Q40</b>         | 197 b | <b>Q40/len</b>        | 0.76  |             |        |

### ▼ Sequence

|                          |     |                         |   |                      |     |                        |          |
|--------------------------|-----|-------------------------|---|----------------------|-----|------------------------|----------|
| <b>Previous Revision</b> | n/a | <b>Current Revision</b> | 1 | <b>Next Revision</b> | n/a | <b>Latest Revision</b> | <u>1</u> |
|--------------------------|-----|-------------------------|---|----------------------|-----|------------------------|----------|

Links: [View Revision History](#)

>5P\_1RR\_WPG1372-user\_added CHROMAT\_ID=1601340

```

geatgggkateleaactcctgagctcaccagcctcttcctgcagagcactgggctcaagg      60
gtgtgcaccacccccacaccagtaaaagctgctcttcttttaccctcctacaaagtcct      120
caatcataaacttcgtatagcatatacgaagttattacaggcagccatttaactat      180
tgtgacctgattgttagcatttttagagttttctttattattggatatgtgtgggtgttt      240
tgctgatgtatgtcaaa
  
```

Targeted 5' loxP

### ▼ Quality Graph

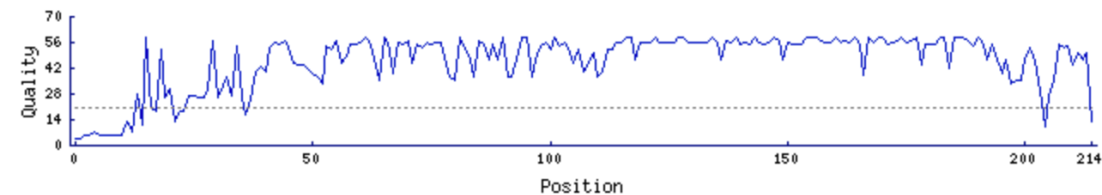

|                    |       |                       |       |             |        |
|--------------------|-------|-----------------------|-------|-------------|--------|
| <b>Read Length</b> | 215 b | <b>Trimmed Length</b> | 206 b | <b>Pos.</b> | 10-215 |
| <b>Q20</b>         | 194 b | <b>Q20/len</b>        | 0.90  |             |        |
| <b>Q40</b>         | 155 b | <b>Q40/len</b>        | 0.72  |             |        |

### ▼ Sequence

|                          |     |                         |   |                      |     |                        |          |
|--------------------------|-----|-------------------------|---|----------------------|-----|------------------------|----------|
| <b>Previous Revision</b> | n/a | <b>Current Revision</b> | 1 | <b>Next Revision</b> | n/a | <b>Latest Revision</b> | <u>1</u> |
|--------------------------|-----|-------------------------|---|----------------------|-----|------------------------|----------|

Links: [View Revision History](#)

>3P\_1RR\_WPG1374-user\_added CHROMAT\_ID=1601335

```

gtcaattgatgggttggtttgtagtagtcgtgctcaataaacttcgtatagcatatacatt      60
atacgaagttatgaaggaagaaattagattcagaaatctctctcttcccttctccct      120
ctccttctttctctctatctattgatacagggtaaaattggaaggtgggaataaagga      180
tgggaaaaagaagaaccactacaaagtggcaaaga
  
```

Targeted 3' loxP

Figure S3

(a)

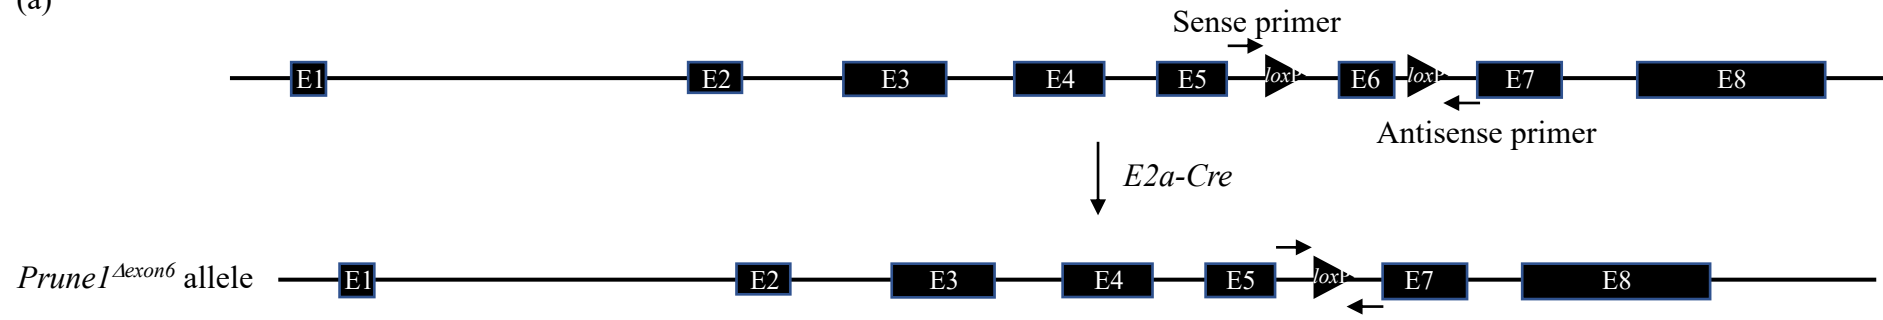

(b)

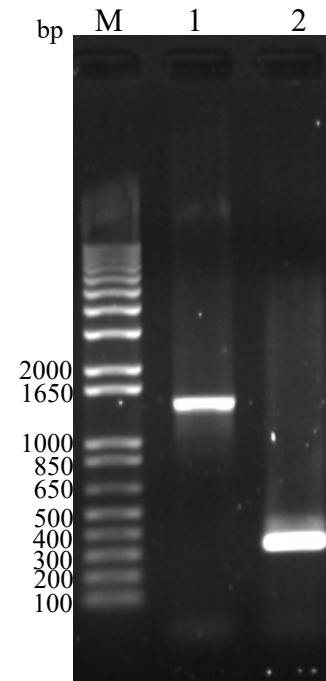

Figure S4
